# Supplementary material for: Synthesis and properties of hyperbranched polyimides derived from tetra-amine and long-chain aromatic dianhydrides
Source: Royal Society of Chemistry journal article supplement (doi:10.1039/c5ra23227a), 2015-01-01
Supplement: c5ra23227a1.pdf [file c5ra23227a1.pdf]

## Synthesis and properties of hyperbranched polyimides derived from tetra-amine and long-chain aromatic dianhydrides

Shanyou Liu<sup>1</sup>, Yunhe Zhang<sup>1</sup>, Xueping Wang<sup>2</sup>, Haiwei Tan<sup>1</sup>, Ningnig Song<sup>1</sup>, Shaowei Guan<sup>1\*</sup>

<sup>1</sup> Alan G. MacDiarmid Laboratory College of Chemistry, Jilin University, Qianjin Road 2699, Changchun 130012, People's Republic of China

<sup>2</sup> Optoelectronic information science and technology department, College of Science, Changchun University of Science and Technology, Weixing Road 7089, Changchun 130022, People's Republic of China

Correspondence to: Shaowei Guan (Email: guansw@jlu.edu.cn)

### Supporting information

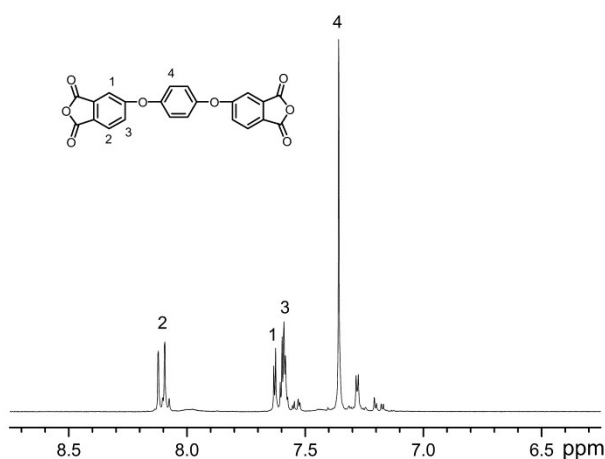

**Fig. s1** <sup>1</sup>H NMR spectrum of 1 dianhydride.

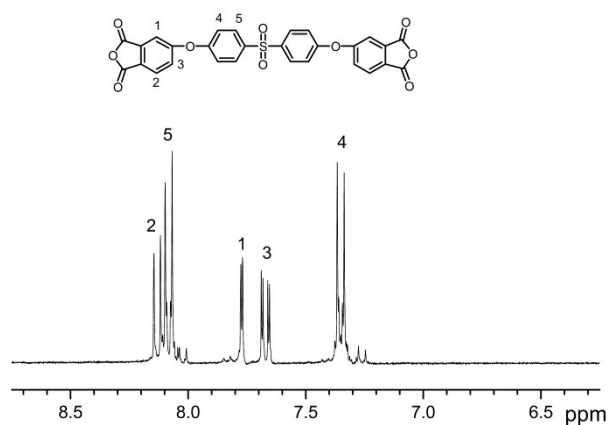

**Fig. s2**  $^1\text{H}$  NMR spectrum of 2 dianhydride.

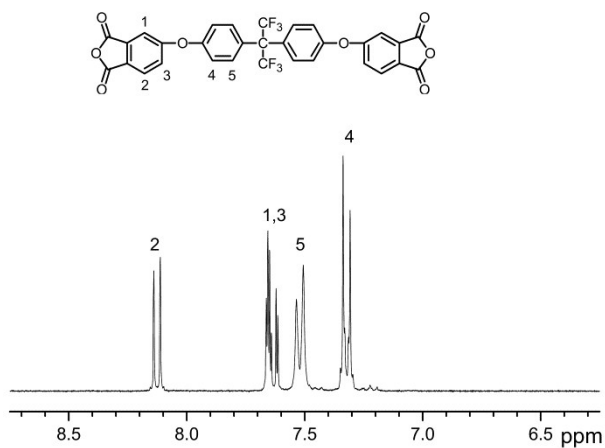

**Fig. s3**  $^1\text{H}$  NMR spectrum of 3 dianhydride.

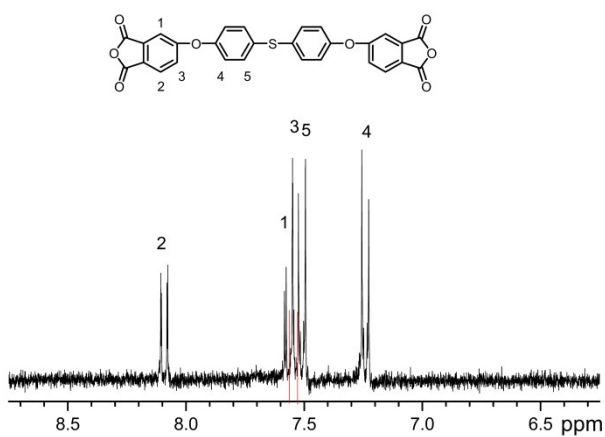

**Fig. s4**  $^1\text{H}$  NMR spectrum of 4 dianhydride.

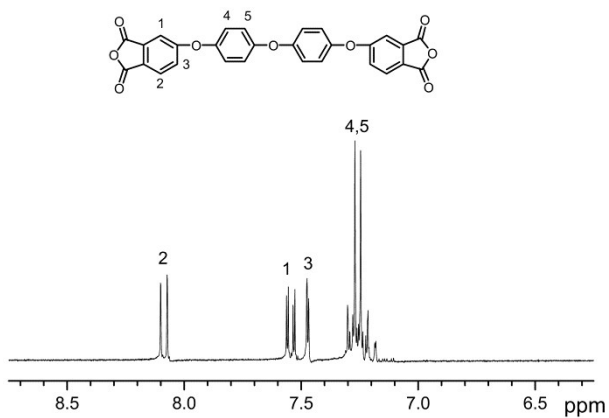

**Fig. s5**  $^1\text{H}$  NMR spectrum of 5 dianhydride.
